# Supplementary material
Source: PubMed Central journal article supplement (PMC3520617)

## Supporting Material for Li et al.

### Supplementary Figure Legends

**Figure S1** (A) An outline of steps taken to differentiate ESCs into myeloid progenitors and subsequently neutrophils. Phase-contrast images and Wright-Giemsa staining of cells at various stages are shown. (B) The experimental condition for immortalizing ESC-derived progenitors. (C) mEB8-ER or mBB8-ER cells ( $2 \times 10^5$ ) were cultured in the presence or absence of  $\beta$ -estradiol for 2, 4, 6, and 8 d. Cells were counted with a hemocytometer. Quantification of four separate experiments is shown. Each represents the mean $\pm$ SEM (error bars).

**Figure S2.** Wright-Giemsa staining of mEB8-ER (top) or mBB8-ER cells (bottom) induced to differentiate with 2 ng/ml G-CSF for indicated times. Bar, 10  $\mu$ m.

**Figure S3.** (A) Surface expression of B220 and TER119 in mEB8-ER or mBB8-ER cells measured with flow cytometry. Cells were induced to differentiate in the presence of G-CSF (2 ng/ml, 6 days). Cells prior to induction of differentiation were used as a negative control (“Control”). (B) Wright-Giemsa staining (left) and surface expression of Gr-1 and CD11b (right) in mEB8-ER (top) and mBB8-ER cells (bottom) assessed with flow cytometry. Cells were induced to differentiate for 6 days after the addition of 2 ng/ml GM-CSF. Cells prior to induction of differentiation were used as a negative control (“Control”).

**Figure S4.** Histograms of surface expression of Gr-1(left) and CD11b (right) in mEB8-ER cells induced to differentiate with G-CSF (2 ng, 6 days) with (black lines) or without inhibitor treatments (red lines). AG1296 exerted little effects while bisindolylmaleimide I, Syk inhibitor and

rapamycin reduced the level of Gr-1 and CD11b. Numbers denote the level of expression of the markers.

**Figure S5.** (A) Rate of apoptosis in differentiated mEB8-ER cells with or without rapamycin treatment. mEB8-ER cells were induced to differentiate in the presence of G-CSF and treated with rapamycin (100 nM, 6 days). Apoptotic cells were analyzed using flow cytometry. Cells without any treatment were used as a control. The ratios of annexin V positive cells for the “control”, the “G-CSF” or the “G-CSF+Rapamycin” group are 6.8%, 9.5% and 9.7%, respectively. No significant statistical differences were observed. (B) Relative number of mEB8-ER cells with (Rap) or without (Control) rapamycin treatment. mEB8-ER cells were cultured as a monolayer in the presence of  $\beta$ -estradiol for 5 d and counted with a hemocytometer. Quantification of four separate experiments is shown. Each represents the mean $\pm$ SEM (error bars). All values were normalized to the level (=1) in cells without rapamycin treatment (Control). (C) Relative size of colonies of mEB8-ER cells with (Rap) or without (Control) rapamycin treatment. Cells were cultivated in MethoCult® GF M3434 medium for 10 days. Quantification of four separate experiments is shown. Each represents the mean $\pm$ SEM (error bars). All values were normalized to the level (=1) in cells without rapamycin treatment (Control). (D) Relative number of mEB8-ER cells cultured with (G+Rap) or without (G-CSF) rapamycin treatment under differentiation conditions (i.e., in the presence of G-CSF for 6 days). Quantification of four separate experiments is shown. Each represents the mean $\pm$ SEM (error bars). All values were normalized to the level (=1) in cells without rapamycin treatment.

**Figure S6.** (A) Relative percentage of B220 and TER-119-positive cells in mEB8-ER cells with or without rapamycin treatment, measured with flow cytometry. Cells were induced to differentiate in the presence of G-CSF (2 ng/ml, 6 days) with (“G+Rap”) or without (“G-CSF”) rapamycin treatment (100 nM). Four separate experiments were conducted, and quantification of three replicates of a typical experiment is shown. Each bar represents the mean  $\pm$  SEM (error bars). All values were normalized to the level (=1) in cells without depletion. (B) Western blot of Rictor in mEB8-ER cells with or without shRNAs targeting Rictor.  $\alpha$ -Tubulin was a loading control. A typical blot from 4 independent experiments is shown. Bottom panel: Quantification of blots from four separate experiments is shown. Each bar represents the mean  $\pm$  SEM. \*,  $p < 0.05$ . LMP: the empty retrovector. (C) Relative percentage of CD11b and Gr-1-positive cells with or without Rictor depletion, measured with flow cytometry. Four separate experiments were conducted, and quantification of three replicates of a typical experiment is shown. Each bar represents the mean  $\pm$  SEM (error bars). All values were normalized to the level (=1) in cells without depletion.

Supplementary Figures

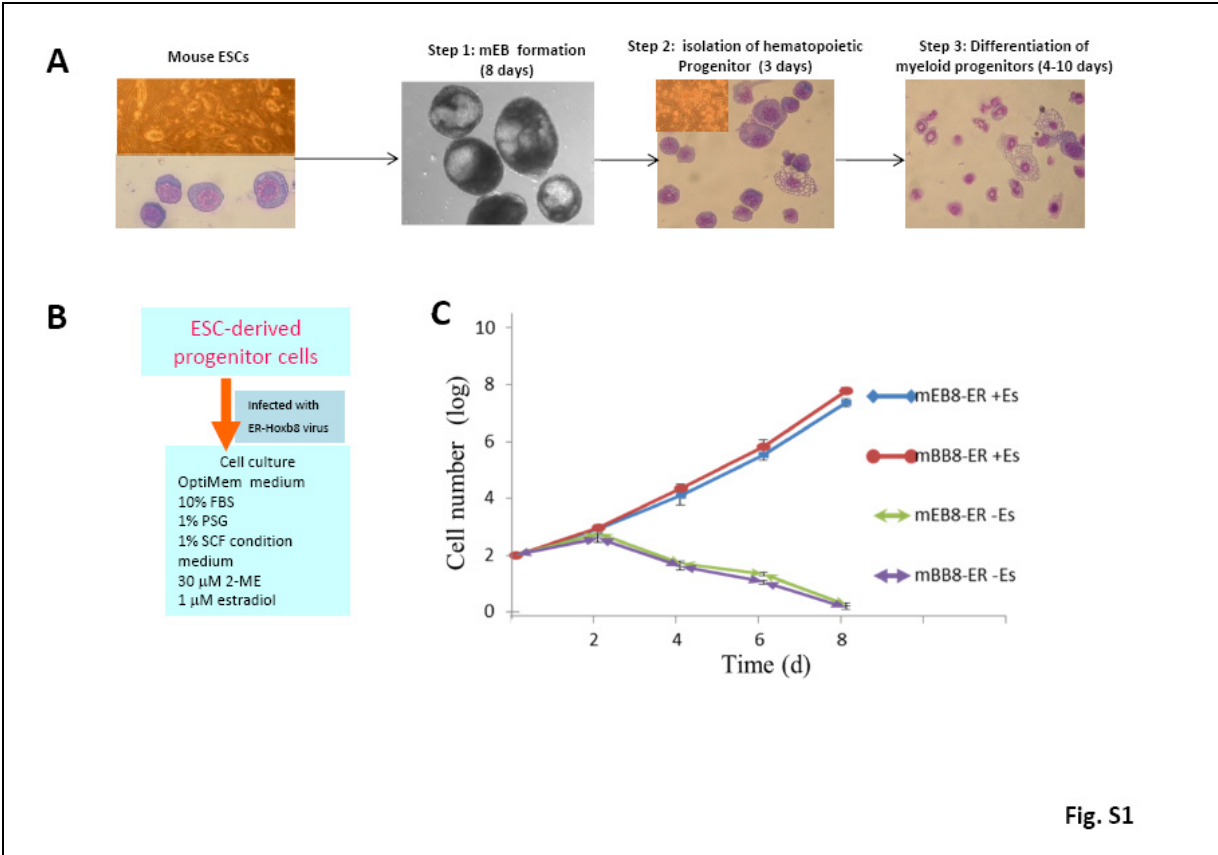

Fig. S1

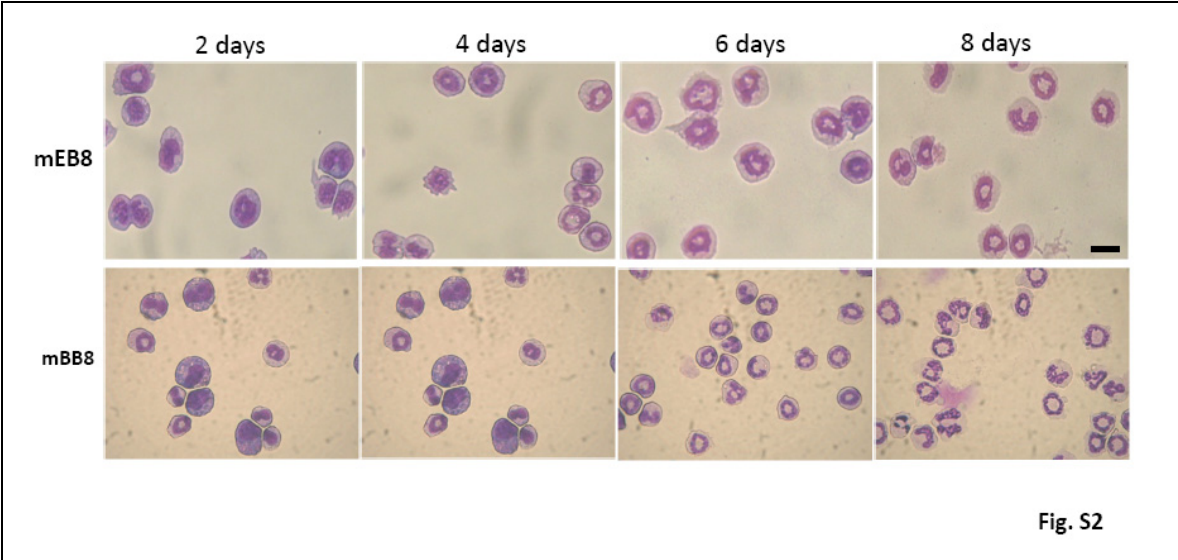

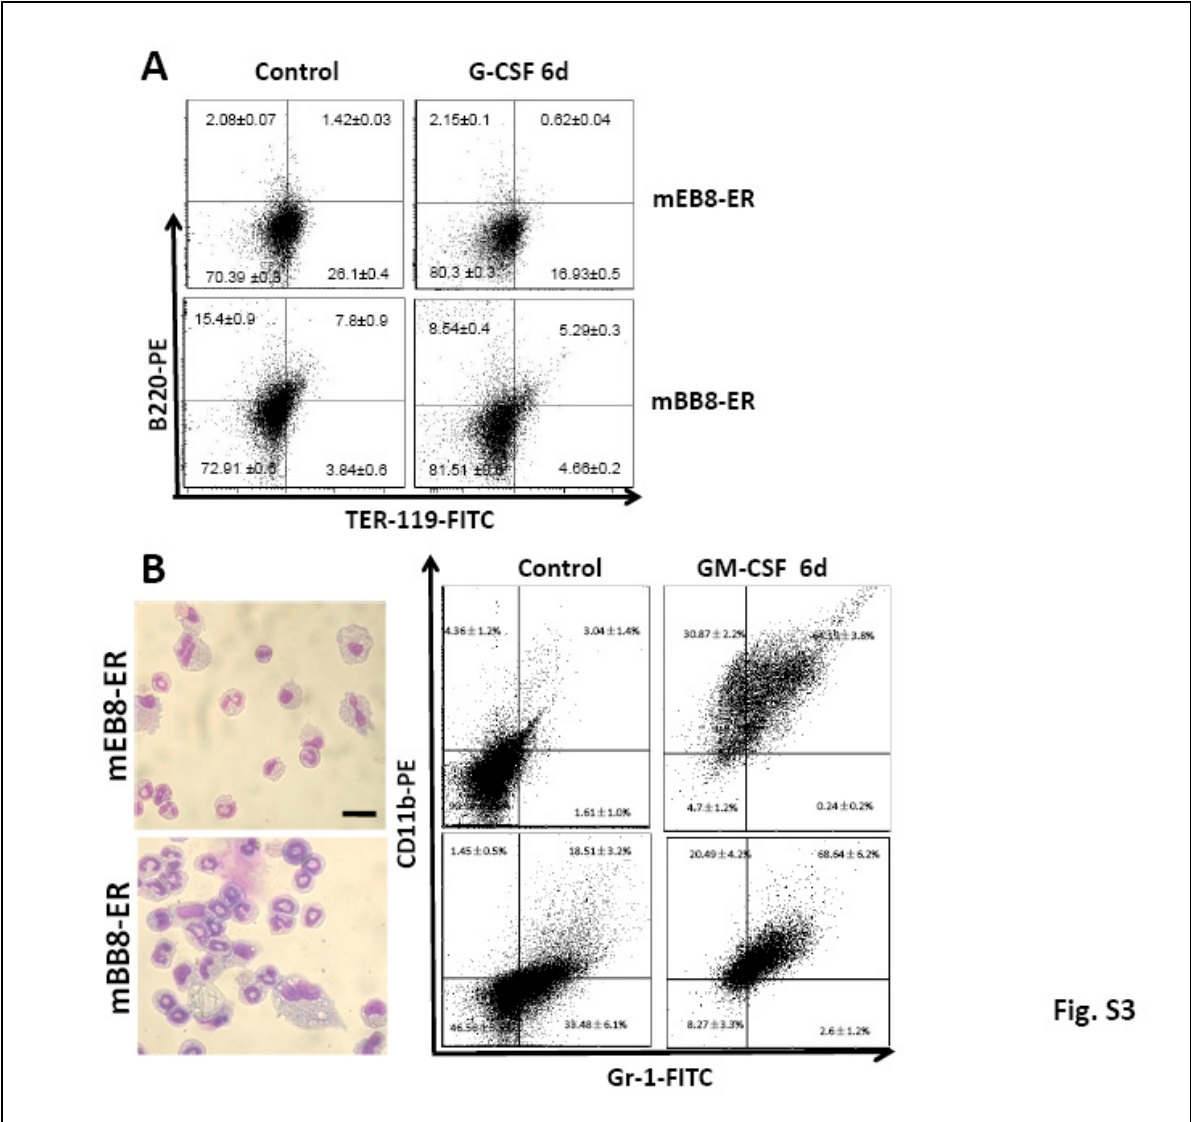

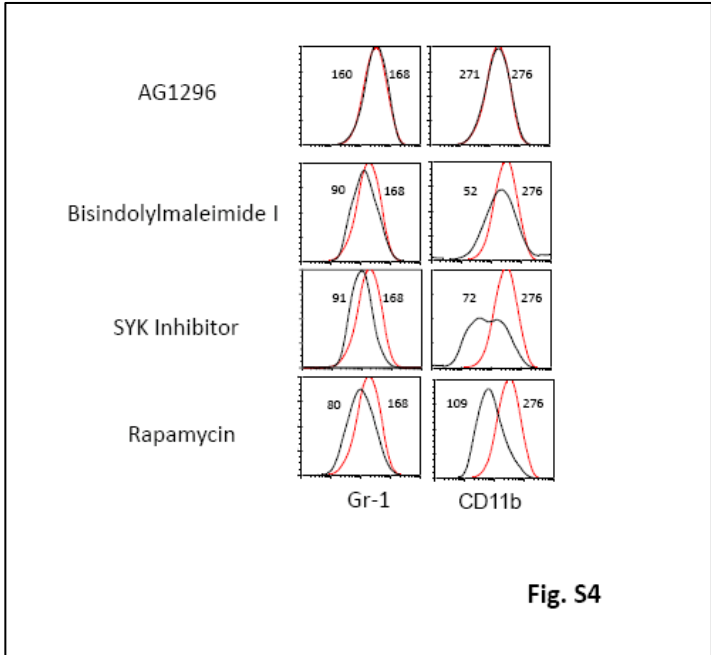

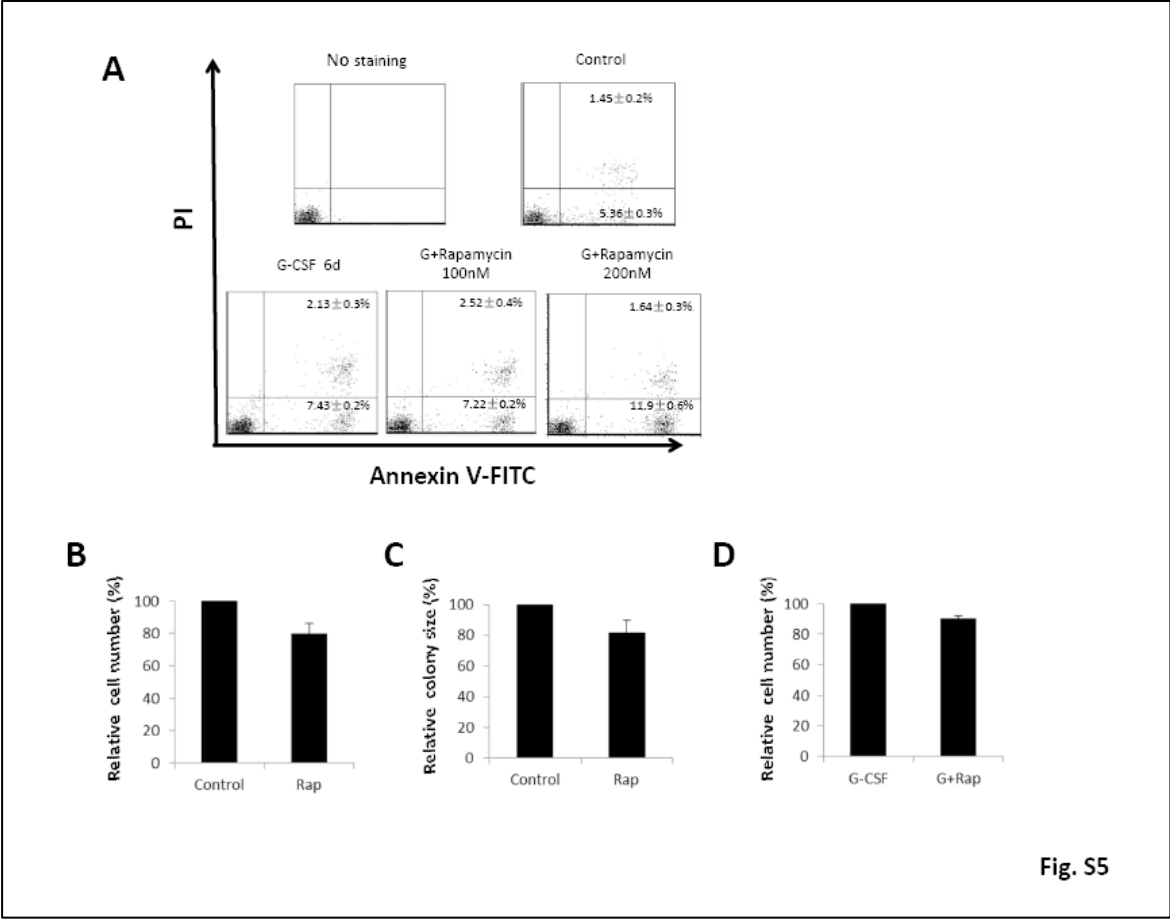



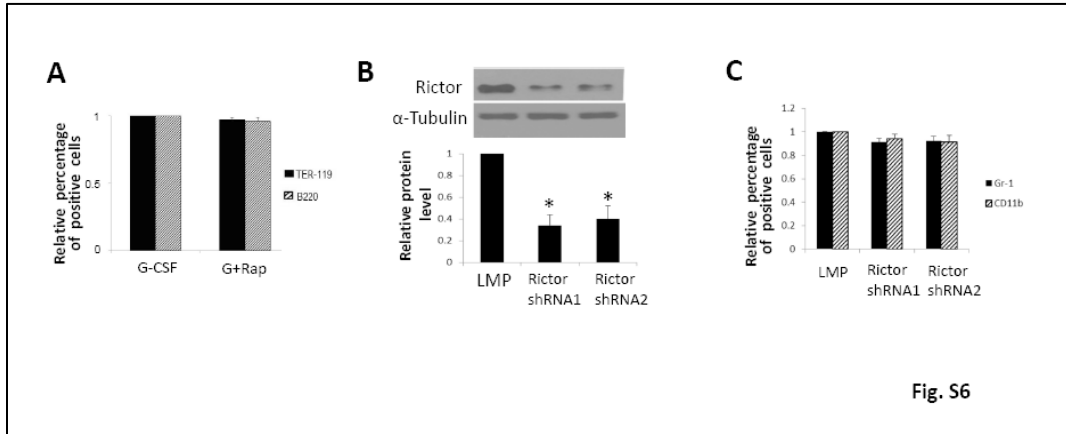

Supplement: supp_blood-2012-03-414979_blood-2012-03-414979-1.pdf [file supp_blood-2012-03-414979_blood-2012-03-414979-1.pdf]
